# Supplementary material
Source: MDPI journal article supplement (https://www.mdpi.com/2624-8549/3/3/72)
Supplement: s1 [file s1]

# Supporting Information:

## Spatial Contributions to $^1\text{H}$ NMR Chemical Shifts of Free-Base Porphyrinoids

Heike Fliegl,<sup>†</sup> Maria Dimitrova,<sup>‡</sup> Raphael J. F. Berger,<sup>¶</sup> and Dage Sundholm<sup>\*,‡</sup>

<sup>†</sup>Karlsruhe Institute of Technology, Institute of Nanotechnology, Hermann-von-Helmholtz Platz 1, D-76344 Eggenstein-Leopoldshafen, Germany

<sup>‡</sup>Department of Chemistry, P.O. Box 55 (A.I. Virtanens plats 1), FI-00014 University of Helsinki, Finland

<sup>¶</sup>Chemistry of Materials, Paris-Lodron University of Salzburg, Jakob-Haringerstr. 2A, A-5020 Salzburg, Austria.

E-mail: dage.sundholm@helsinki.fi

### S1 Optimized molecular geometries

#### S1.1 Free-base trans-porphyrin

38

|   |               |               |              |
|---|---------------|---------------|--------------|
| H | 1.1040146453  | 0.0000000000  | 0.0000000000 |
| N | 2.1352114913  | 0.0000000000  | 0.0000000000 |
| C | 2.9180354650  | -1.1345237048 | 0.0000000000 |
| C | 2.9180354650  | 1.1345237048  | 0.0000000000 |
| C | 4.2915746137  | -0.6919362118 | 0.0000000000 |
| C | 4.2915746137  | 0.6919362118  | 0.0000000000 |
| H | 5.1596090171  | -1.3639029600 | 0.0000000000 |
| H | 5.1596090171  | 1.3639029600  | 0.0000000000 |
| C | 2.4374187734  | -2.4538971596 | 0.0000000000 |
| H | 3.2039598564  | -3.2453519248 | 0.0000000000 |
| H | -1.1040146453 | 0.0000000000  | 0.0000000000 |
| N | 0.0000000000  | -2.0395485771 | 0.0000000000 |
| N | -2.1352114913 | 0.0000000000  | 0.0000000000 |
| N | 0.0000000000  | 2.0395485771  | 0.0000000000 |
| C | -1.0895128344 | -2.8696821891 | 0.0000000000 |
| C | -2.9180354650 | 1.1345237048  | 0.0000000000 |
| C | 1.0895128344  | 2.8696821891  | 0.0000000000 |
| C | 1.0895128344  | -2.8696821891 | 0.0000000000 |
| C | -2.9180354650 | -1.1345237048 | 0.0000000000 |
| C | -1.0895128344 | 2.8696821891  | 0.0000000000 |
| C | -0.6846007936 | -4.2795792989 | 0.0000000000 |
| C | -4.2915746137 | 0.6919362118  | 0.0000000000 |
| C | 0.6846007936  | 4.2795792989  | 0.0000000000 |
| C | 0.6846007936  | -4.2795792989 | 0.0000000000 |

|   |               |               |              |
|---|---------------|---------------|--------------|
| C | -4.2915746137 | -0.6919362118 | 0.0000000000 |
| C | -0.6846007936 | 4.2795792989  | 0.0000000000 |
| H | -1.3668637177 | -5.1413680988 | 0.0000000000 |
| H | -5.1596090171 | 1.3639029600  | 0.0000000000 |
| H | 1.3668637177  | 5.1413680988  | 0.0000000000 |
| H | 1.3668637177  | -5.1413680988 | 0.0000000000 |
| H | -5.1596090171 | -1.3639029600 | 0.0000000000 |
| H | -1.3668637177 | 5.1413680988  | 0.0000000000 |
| C | -2.4374187734 | -2.4538971596 | 0.0000000000 |
| C | -2.4374187734 | 2.4538971596  | 0.0000000000 |
| C | 2.4374187734  | 2.4538971596  | 0.0000000000 |
| H | -3.2039598564 | -3.2453519248 | 0.0000000000 |
| H | -3.2039598564 | 3.2453519248  | 0.0000000000 |
| H | 3.2039598564  | 3.2453519248  | 0.0000000000 |

The Turbomole optimized molecular structure of trans-porphyrin as an xyz file<sup>?</sup>

## S1.2 Free-base isophlorin

40

|   |               |               |              |
|---|---------------|---------------|--------------|
| H | 1.2138256732  | -0.0000040886 | 0.0000000000 |
| N | 2.2043019071  | -0.0000013588 | 0.0000000000 |
| C | 2.9737728939  | -1.1456166430 | 0.0000000000 |
| C | 2.9737694129  | 1.1456174978  | 0.0000000000 |
| C | 4.2928936622  | -0.7055040197 | 0.0000000000 |
| C | 4.2928898846  | 0.7055117019  | 0.0000000000 |
| H | 5.1564212206  | -1.3500760053 | 0.0000000000 |
| H | 5.1564138711  | 1.3500878120  | 0.0000000000 |
| C | 2.4532579269  | -2.4862996891 | 0.0000000000 |
| H | 3.2068552443  | -3.2622338070 | 0.0000000000 |
| H | -1.2138175741 | 0.0000067477  | 0.0000000000 |
| N | -0.0000100355 | -2.1491476784 | 0.0000000000 |
| N | -2.2042956084 | 0.0000006510  | 0.0000000000 |
| N | -0.0000131723 | 2.1491495964  | 0.0000000000 |
| C | -1.1626349216 | -2.9192475043 | 0.0000000000 |
| C | -2.9737707702 | 1.1456115322  | 0.0000000000 |
| C | 1.1626196733  | 2.9192530062  | 0.0000000000 |
| C | 1.1626214275  | -2.9192533093 | 0.0000000000 |
| C | -2.9737651535 | -1.1456127622 | 0.0000000000 |
| C | -1.1626363017 | 2.9192481383  | 0.0000000000 |
| C | -0.6762877996 | -4.2858840178 | 0.0000000000 |
| C | -4.2928938349 | 0.7055014693  | 0.0000000000 |
| C | 0.6762780099  | 4.2858886202  | 0.0000000000 |
| C | 0.6762750619  | -4.2858895495 | 0.0000000000 |
| C | -4.2928893230 | -0.7055118892 | 0.0000000000 |
| C | -0.6762845107 | 4.2858862279  | 0.0000000000 |
| H | -1.3261949616 | -5.1463635747 | 0.0000000000 |
| H | -5.1564173325 | 1.3500786452  | 0.0000000000 |
| H | 1.3261678366  | 5.1463807659  | 0.0000000000 |
| H | 1.3261629358  | -5.1463836358 | 0.0000000000 |
| H | -5.1564076023 | -1.3500952179 | 0.0000000000 |
| H | -1.3261905134 | 5.1463674718  | 0.0000000000 |
| C | -2.4532698492 | -2.4862970337 | 0.0000000000 |
| C | -2.4532747707 | 2.4862985484  | 0.0000000000 |
| C | 2.4532529706  | 2.4862974170  | 0.0000000000 |
| H | -3.2068725273 | -3.2622234583 | 0.0000000000 |

|   |               |               |              |
|---|---------------|---------------|--------------|
| H | -3.2068765965 | 3.2622273730  | 0.0000000000 |
| H | 3.2068490662  | 3.2622316338  | 0.0000000000 |
| H | 0.0000923528  | 1.1597831980  | 0.0000000000 |
| H | 0.0000821275  | -1.1597828110 | 0.0000000000 |

The Turbomole optimized molecular structure of free-base isophlorin as an xyz file.

### S1.3 Free-base trans-norcorrole

34

|   |               |               |               |
|---|---------------|---------------|---------------|
| C | 3.1367113581  | -0.8563208715 | -0.1178777568 |
| C | 2.8063639364  | 0.4813169136  | -0.2490699976 |
| C | 3.5218041661  | 1.6759148983  | 0.1548604356  |
| C | 2.6191906019  | 2.7055849190  | 0.1391374747  |
| C | 1.3599478851  | 2.1334848836  | -0.2938176428 |
| C | -0.0388036217 | 2.5930464079  | -0.2873394801 |
| C | -0.7891639161 | 3.6551063861  | 0.2435836017  |
| C | -2.1363653830 | 3.2426336262  | 0.2746414105  |
| C | -2.1900279052 | 1.9270773414  | -0.2310502327 |
| C | -3.1367701681 | 0.8561707129  | -0.1171749153 |
| C | -2.8064723155 | -0.4816056300 | -0.2470334427 |
| C | -3.5217281351 | -1.6757697755 | 0.1585133213  |
| C | -2.6191438235 | -2.7054829877 | 0.1433994623  |
| C | -1.3601074636 | -2.1338542032 | -0.2907766948 |
| C | 0.0386520435  | -2.5933830086 | -0.2843621853 |
| C | 0.7892760469  | -3.6547670331 | 0.2475477276  |
| C | 2.1364886407  | -3.2422621854 | 0.2773936062  |
| C | 2.1899297869  | -1.9273707548 | -0.2300379536 |
| H | 4.1345910223  | -1.1078151781 | 0.2202885429  |
| H | -4.1344767645 | 1.1080579170  | 0.2211917297  |
| H | 4.5580609323  | 1.7265969208  | 0.4520760096  |
| H | 2.7955397230  | 3.7309817895  | 0.4227480367  |
| H | -0.4009695699 | 4.5946746997  | 0.5999811580  |
| H | -2.9686568925 | 3.8090170672  | 0.6601853943  |
| H | -4.5578242966 | -1.7260679747 | 0.4563571801  |
| H | -2.7953469302 | -3.7305947544 | 0.4281380275  |
| H | 0.4012381063  | -4.5938577191 | 0.6053854129  |
| H | 2.9689491736  | -3.8081572420 | 0.6632934881  |
| N | 1.5094288709  | 0.8559689236  | -0.5598721229 |
| N | -0.9203672734 | 1.6328747021  | -0.6202112142 |
| N | -1.5096887547 | -0.8566010065 | -0.5580586132 |
| N | 0.9200594058  | -1.6336341368 | -0.6189342380 |
| H | -0.6883963609 | 0.6631931954  | -0.8317200828 |
| H | 0.6880778744  | -0.6641568432 | -0.8313854469 |

The Turbomole optimized molecular structure of trans-norcorrole as an xyz file.

## S2 Atomic contributions to magnetic shielding constants

The atomic contributions to the isotropic  $^1\text{H}$  NMR shielding constants calculated at the BHandHLYP level using the pcseg-3 basis sets.

## S2.1 Free-base trans-porphyrin

### S2.1.1 Inner hydrogen (atom 1)

$$\sigma_{xx} = 25.747313$$

$$\sigma_{yy} = 23.637856$$

$$\sigma_{zz} = 63.164402$$

|                       |   |            |
|-----------------------|---|------------|
| shielding constant    | = | 37.516523  |
| positive contribution | = | 52.055053  |
| negative contribution | = | -14.538530 |
| sum                   | = | 37.516523  |

| atom contributions, total, positive, negative |    |           |           |            |
|-----------------------------------------------|----|-----------|-----------|------------|
| atom                                          | 1  | 12.854767 | 16.841950 | -3.987183  |
| atom                                          | 2  | 5.275998  | 7.067669  | -1.791671  |
| atom                                          | 3  | 2.351627  | 2.888484  | -0.536857  |
| atom                                          | 4  | 2.351627  | 2.888484  | -0.536857  |
| atom                                          | 5  | 0.951516  | 1.169492  | -0.217976  |
| atom                                          | 6  | 0.951516  | 1.169492  | -0.217976  |
| atom                                          | 7  | 0.213403  | 0.213890  | -0.000487  |
| atom                                          | 8  | 0.213403  | 0.213890  | -0.000487  |
| atom                                          | 9  | 1.538546  | 1.885742  | -0.347196  |
| atom                                          | 10 | 0.274250  | 0.274554  | -0.000304  |
| atom                                          | 11 | -0.509123 | 0.009360  | -0.518483  |
| atom                                          | 12 | -0.262820 | 1.232433  | -1.495253  |
| atom                                          | 13 | 0.170400  | 0.549085  | -0.378685  |
| atom                                          | 14 | -0.262820 | 1.232433  | -1.495253  |
| atom                                          | 15 | 0.824887  | 1.044848  | -0.219961  |
| atom                                          | 16 | 0.574244  | 0.744414  | -0.170170  |
| atom                                          | 17 | 1.159747  | 1.629181  | -0.469435  |
| atom                                          | 18 | 1.159747  | 1.629181  | -0.469435  |
| atom                                          | 19 | 0.574244  | 0.744414  | -0.170170  |
| atom                                          | 20 | 0.824887  | 1.044848  | -0.219961  |
| atom                                          | 21 | 0.374798  | 0.498743  | -0.123946  |
| atom                                          | 22 | 0.336621  | 0.409544  | -0.072923  |
| atom                                          | 23 | 0.348623  | 0.490017  | -0.141395  |
| atom                                          | 24 | 0.348623  | 0.490017  | -0.141395  |
| atom                                          | 25 | 0.336621  | 0.409544  | -0.072923  |
| atom                                          | 26 | 0.374798  | 0.498743  | -0.123946  |
| atom                                          | 27 | 0.122865  | 0.123104  | -0.000240  |
| atom                                          | 28 | 0.091435  | 0.091782  | -0.000347  |
| atom                                          | 29 | 0.126149  | 0.128090  | -0.001940  |
| atom                                          | 30 | 0.126149  | 0.128090  | -0.001940  |
| atom                                          | 31 | 0.091435  | 0.091782  | -0.000347  |
| atom                                          | 32 | 0.122865  | 0.123104  | -0.000240  |
| atom                                          | 33 | 0.693450  | 0.826138  | -0.132688  |
| atom                                          | 34 | 0.693450  | 0.826138  | -0.132688  |
| atom                                          | 35 | 1.538546  | 1.885742  | -0.347196  |
| atom                                          | 36 | 0.142899  | 0.143036  | -0.000137  |
| atom                                          | 37 | 0.142899  | 0.143036  | -0.000137  |
| atom                                          | 38 | 0.274250  | 0.274554  | -0.000304  |
| sum                                           |    | 37.516523 | 52.055053 | -14.538530 |

### S2.1.2 Meso hydrogen (atom 10)

$$\sigma_{xx} = 27.195053$$

$$\sigma_{yy} = 27.619085$$

$$\sigma_{zz} = 5.884763$$

```

shielding constant   =      20.232967
positive contribution =      35.048321
negative contribution =     -14.815354
sum                  =      20.232967

```

atom contributions, total, positive, negative

|      |    |           |           |            |
|------|----|-----------|-----------|------------|
| atom | 1  | 0.115737  | 0.127140  | -0.011403  |
| atom | 2  | 0.138256  | 0.408772  | -0.270516  |
| atom | 3  | -0.929038 | 0.803620  | -1.732657  |
| atom | 4  | 0.297276  | 0.466793  | -0.169517  |
| atom | 5  | -0.268978 | 0.613149  | -0.882127  |
| atom | 6  | 0.568199  | 0.710049  | -0.141850  |
| atom | 7  | 0.088603  | 0.226327  | -0.137724  |
| atom | 8  | 0.142518  | 0.143121  | -0.000603  |
| atom | 9  | -0.682782 | 4.355265  | -5.038048  |
| atom | 10 | 18.397033 | 20.493397 | -2.096364  |
| atom | 11 | -0.078376 | 0.002582  | -0.080958  |
| atom | 12 | 0.139076  | 0.477854  | -0.338778  |
| atom | 13 | 0.028558  | 0.145283  | -0.116724  |
| atom | 14 | -0.026520 | 0.163506  | -0.190027  |
| atom | 15 | 0.141664  | 0.378825  | -0.237160  |
| atom | 16 | 0.188567  | 0.232137  | -0.043570  |
| atom | 17 | 0.216537  | 0.303469  | -0.086933  |
| atom | 18 | -0.618970 | 0.914586  | -1.533556  |
| atom | 19 | 0.173617  | 0.261689  | -0.088072  |
| atom | 20 | 0.189006  | 0.240706  | -0.051700  |
| atom | 21 | 0.477489  | 0.648714  | -0.171225  |
| atom | 22 | 0.155555  | 0.186416  | -0.030861  |
| atom | 23 | 0.077432  | 0.123742  | -0.046311  |
| atom | 24 | -0.251642 | 0.657806  | -0.909448  |
| atom | 25 | 0.106413  | 0.146068  | -0.039655  |
| atom | 26 | 0.117043  | 0.152975  | -0.035932  |
| atom | 27 | 0.146194  | 0.146796  | -0.000602  |
| atom | 28 | 0.044874  | 0.044935  | -0.000060  |
| atom | 29 | 0.035461  | 0.038538  | -0.003077  |
| atom | 30 | 0.078168  | 0.231983  | -0.153815  |
| atom | 31 | 0.036541  | 0.039338  | -0.002796  |
| atom | 32 | 0.044362  | 0.044437  | -0.000075  |
| atom | 33 | 0.263013  | 0.332025  | -0.069013  |
| atom | 34 | 0.210102  | 0.245248  | -0.035146  |
| atom | 35 | 0.276649  | 0.340260  | -0.063610  |
| atom | 36 | 0.072362  | 0.075347  | -0.002985  |
| atom | 37 | 0.050763  | 0.050805  | -0.000042  |
| atom | 38 | 0.072203  | 0.074618  | -0.002415  |
| sum  |    | 20.232967 | 35.048321 | -14.815354 |

### S2.1.3 $\beta$ hydrogen in pyrrole ring with inner hydrogen (atom 7)

$$\sigma_{xx} = 24.445006$$

$$\sigma_{yy} = 26.417525$$

$$\sigma_{zz} = 11.765908$$

```

shielding constant   =      20.876146
positive contribution =      33.681130
negative contribution =     -12.804984
sum                  =      20.876146

```

| atom contributions, total, positive, negative |    |           |           |            |
|-----------------------------------------------|----|-----------|-----------|------------|
| atom                                          | 1  | 0.170976  | 0.171982  | -0.001006  |
| atom                                          | 2  | -0.040733 | 0.467345  | -0.508079  |
| atom                                          | 3  | -1.224128 | 0.664972  | -1.889100  |
| atom                                          | 4  | 0.027509  | 0.537962  | -0.510453  |
| atom                                          | 5  | 0.682943  | 5.034995  | -4.352053  |
| atom                                          | 6  | 0.938876  | 1.572872  | -0.633997  |
| atom                                          | 7  | 18.114521 | 20.196297 | -2.081775  |
| atom                                          | 8  | 0.335071  | 0.361500  | -0.026430  |
| atom                                          | 9  | -0.449245 | 0.415662  | -0.864906  |
| atom                                          | 10 | 0.010865  | 0.183797  | -0.172932  |
| atom                                          | 11 | -0.068103 | 0.000705  | -0.068808  |
| atom                                          | 12 | 0.023792  | 0.207372  | -0.183580  |
| atom                                          | 13 | 0.020770  | 0.105584  | -0.084814  |
| atom                                          | 14 | -0.007380 | 0.157676  | -0.165056  |
| atom                                          | 15 | 0.142360  | 0.220555  | -0.078194  |
| atom                                          | 16 | 0.145060  | 0.184454  | -0.039394  |
| atom                                          | 17 | 0.175920  | 0.289053  | -0.113133  |
| atom                                          | 18 | 0.111407  | 0.356150  | -0.244744  |
| atom                                          | 19 | 0.139444  | 0.189876  | -0.050431  |
| atom                                          | 20 | 0.153723  | 0.205768  | -0.052044  |
| atom                                          | 21 | 0.190193  | 0.253672  | -0.063479  |
| atom                                          | 22 | 0.110337  | 0.132932  | -0.022594  |
| atom                                          | 23 | 0.043742  | 0.118875  | -0.075133  |
| atom                                          | 24 | -0.013058 | 0.177952  | -0.191010  |
| atom                                          | 25 | 0.096765  | 0.120998  | -0.024233  |
| atom                                          | 26 | 0.130089  | 0.170524  | -0.040435  |
| atom                                          | 27 | 0.066993  | 0.067133  | -0.000139  |
| atom                                          | 28 | 0.033632  | 0.033733  | -0.000101  |
| atom                                          | 29 | 0.026747  | 0.037630  | -0.010883  |
| atom                                          | 30 | 0.016932  | 0.054934  | -0.038002  |
| atom                                          | 31 | 0.031080  | 0.031692  | -0.000612  |
| atom                                          | 32 | 0.047963  | 0.048028  | -0.000065  |
| atom                                          | 33 | 0.185377  | 0.222421  | -0.037044  |
| atom                                          | 34 | 0.177304  | 0.207777  | -0.030473  |
| atom                                          | 35 | 0.168761  | 0.297973  | -0.129212  |
| atom                                          | 36 | 0.048342  | 0.048755  | -0.000413  |
| atom                                          | 37 | 0.044368  | 0.044423  | -0.000055  |
| atom                                          | 38 | 0.066930  | 0.087102  | -0.020172  |
| sum                                           |    | 20.876146 | 33.681130 | -12.804984 |

#### S2.1.4 $\beta$ hydrogen in pyrrole ring without inner hydrogen (atom 30)

$\sigma_{xx} = 26.135387$   
 $\sigma_{yy} = 23.742174$   
 $\sigma_{zz} = 13.325699$

|                       |   |            |
|-----------------------|---|------------|
| shielding constant    | = | 21.067753  |
| positive contribution | = | 33.880014  |
| negative contribution | = | -12.812261 |
| sum                   | = | 21.067753  |

| atom contributions, total, positive, negative |   |           |          |           |
|-----------------------------------------------|---|-----------|----------|-----------|
| atom                                          | 1 | 0.005774  | 0.036234 | -0.030460 |
| atom                                          | 2 | 0.040836  | 0.195835 | -0.154999 |
| atom                                          | 3 | -0.000270 | 0.287482 | -0.287752 |
| atom                                          | 4 | 0.192679  | 0.254495 | -0.061816 |

|      |    |           |           |            |
|------|----|-----------|-----------|------------|
| atom | 5  | -0.005877 | 0.181888  | -0.187765  |
| atom | 6  | 0.241180  | 0.295377  | -0.054197  |
| atom | 7  | 0.020724  | 0.056838  | -0.036114  |
| atom | 8  | 0.067065  | 0.067200  | -0.000135  |
| atom | 9  | -0.557483 | 0.401208  | -0.958690  |
| atom | 10 | 0.001252  | 0.190857  | -0.189606  |
| atom | 11 | -0.039116 | 0.010593  | -0.049709  |
| atom | 12 | 0.013669  | 0.590406  | -0.576737  |
| atom | 13 | 0.026302  | 0.148211  | -0.121909  |
| atom | 14 | -0.023901 | 0.121450  | -0.145351  |
| atom | 15 | -0.294551 | 0.427724  | -0.722275  |
| atom | 16 | 0.172108  | 0.213664  | -0.041556  |
| atom | 17 | 0.162250  | 0.214770  | -0.052520  |
| atom | 18 | -1.358723 | 0.682401  | -2.041124  |
| atom | 19 | 0.115996  | 0.238636  | -0.122639  |
| atom | 20 | 0.156710  | 0.200089  | -0.043379  |
| atom | 21 | 1.002172  | 1.660655  | -0.658483  |
| atom | 22 | 0.169083  | 0.203575  | -0.034492  |
| atom | 23 | 0.071507  | 0.100219  | -0.028712  |
| atom | 24 | 1.486042  | 5.320623  | -3.834580  |
| atom | 25 | 0.064441  | 0.130916  | -0.066475  |
| atom | 26 | 0.082760  | 0.109290  | -0.026529  |
| atom | 27 | 0.342473  | 0.366261  | -0.023789  |
| atom | 28 | 0.048156  | 0.048213  | -0.000057  |
| atom | 29 | 0.030556  | 0.031311  | -0.000755  |
| atom | 30 | 18.101649 | 20.115889 | -2.014239  |
| atom | 31 | 0.028555  | 0.038641  | -0.010086  |
| atom | 32 | 0.033320  | 0.033452  | -0.000132  |
| atom | 33 | 0.138099  | 0.285441  | -0.147342  |
| atom | 34 | 0.180503  | 0.210640  | -0.030137  |
| atom | 35 | 0.192344  | 0.227781  | -0.035436  |
| atom | 36 | 0.066127  | 0.088030  | -0.021903  |
| atom | 37 | 0.044595  | 0.044648  | -0.000053  |
| atom | 38 | 0.048746  | 0.049073  | -0.000326  |
| sum  |    | 21.067753 | 33.880014 | -12.812261 |

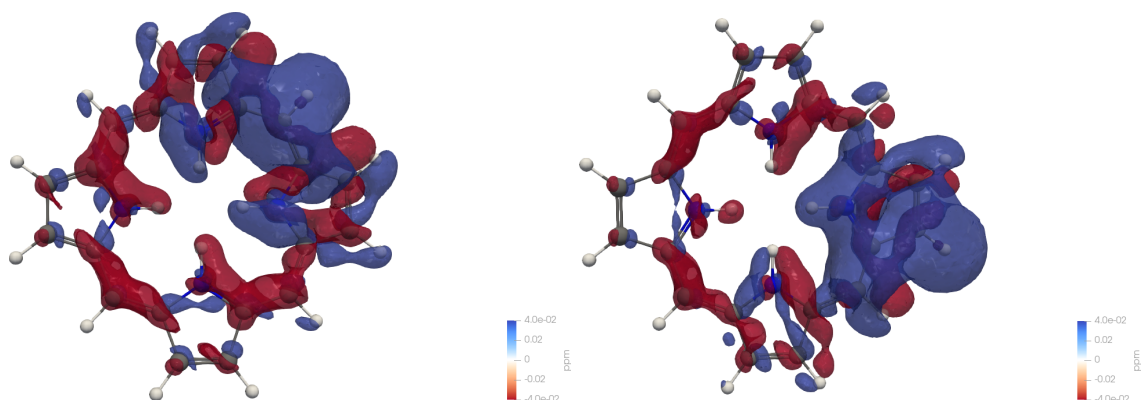

Figure S1: The isotropic  $^1\text{H}$  NMR shielding density of the *meso* and  $\beta$  hydrogens of free-base porphyrin. The shielding contributions are shown in blue and the deshielding contributions in red. An isovalue of  $\pm 0.04$  has been used.

## S2.2 Free-base isophlorin

### S2.2.1 Inner hydrogen (atom 1)

$\sigma_{xx} = 30.474650$   
 $\sigma_{yy} = 29.829815$   
 $\sigma_{zz} = -79.136229$

|                       |   |            |
|-----------------------|---|------------|
| shielding constant    | = | -6.277254  |
| positive contribution | = | 32.480035  |
| negative contribution | = | -38.757290 |
| sum                   | = | -6.277254  |

| atom contributions, total, positive, negative |    |           |           |           |
|-----------------------------------------------|----|-----------|-----------|-----------|
| atom                                          | 1  | 16.463637 | 20.274013 | -3.810376 |
| atom                                          | 2  | 0.964973  | 4.719532  | -3.754559 |
| atom                                          | 3  | -2.184604 | 0.728758  | -2.913362 |
| atom                                          | 4  | -2.184593 | 0.728755  | -2.913348 |
| atom                                          | 5  | -0.488056 | 0.359010  | -0.847065 |
| atom                                          | 6  | -0.488055 | 0.359009  | -0.847065 |
| atom                                          | 7  | 0.215735  | 0.216142  | -0.000407 |
| atom                                          | 8  | 0.215735  | 0.216142  | -0.000407 |
| atom                                          | 9  | -2.379262 | 0.186858  | -2.566120 |
| atom                                          | 10 | 0.227185  | 0.228930  | -0.001745 |
| atom                                          | 11 | -0.567747 | 0.001187  | -0.568934 |
| atom                                          | 12 | -0.886423 | 0.418439  | -1.304862 |
| atom                                          | 13 | -0.744443 | 0.140797  | -0.885240 |
| atom                                          | 14 | -0.886411 | 0.418433  | -1.304844 |
| atom                                          | 15 | -0.840370 | 0.219988  | -1.060358 |
| atom                                          | 16 | -0.863906 | 0.112003  | -0.975909 |
| atom                                          | 17 | -1.848414 | 0.199266  | -2.047680 |
| atom                                          | 18 | -1.848424 | 0.199268  | -2.047692 |
| atom                                          | 19 | -0.863909 | 0.112003  | -0.975912 |
| atom                                          | 20 | -0.840369 | 0.219987  | -1.060356 |
| atom                                          | 21 | -0.331904 | 0.145767  | -0.477671 |
| atom                                          | 22 | -0.155775 | 0.117064  | -0.272839 |
| atom                                          | 23 | -0.337927 | 0.166005  | -0.503932 |
| atom                                          | 24 | -0.337930 | 0.166005  | -0.503935 |
| atom                                          | 25 | -0.155775 | 0.117065  | -0.272839 |
| atom                                          | 26 | -0.331902 | 0.145767  | -0.477669 |
| atom                                          | 27 | 0.107867  | 0.108266  | -0.000400 |
| atom                                          | 28 | 0.084510  | 0.084792  | -0.000282 |
| atom                                          | 29 | 0.109383  | 0.112701  | -0.003318 |
| atom                                          | 30 | 0.109384  | 0.112701  | -0.003318 |
| atom                                          | 31 | 0.084510  | 0.084792  | -0.000282 |
| atom                                          | 32 | 0.107866  | 0.108266  | -0.000400 |
| atom                                          | 33 | -0.949249 | 0.075819  | -1.025068 |
| atom                                          | 34 | -0.949247 | 0.075819  | -1.025065 |
| atom                                          | 35 | -2.379254 | 0.186857  | -2.566111 |
| atom                                          | 36 | 0.112394  | 0.113151  | -0.000756 |
| atom                                          | 37 | 0.112394  | 0.113151  | -0.000756 |
| atom                                          | 38 | 0.227184  | 0.228929  | -0.001745 |
| atom                                          | 39 | -0.788036 | 0.079298  | -0.867334 |
| atom                                          | 40 | -0.788026 | 0.079301  | -0.867327 |



### S2.2.2 Meso hydrogen (atom 10)

$$\sigma_{xx} = 29.180519$$

$$\sigma_{yy} = 28.447813$$

$$\sigma_{zz} = 45.746409$$

|                       |   |            |
|-----------------------|---|------------|
| shielding constant    | = | 34.458247  |
| positive contribution | = | 46.551674  |
| negative contribution | = | -12.093427 |
| sum                   | = | 34.458247  |

| atom contributions, total, positive, negative |    |           |           |           |
|-----------------------------------------------|----|-----------|-----------|-----------|
| atom                                          | 1  | 0.146456  | 0.160089  | -0.013633 |
| atom                                          | 2  | 0.360759  | 0.602969  | -0.242210 |
| atom                                          | 3  | 1.660870  | 2.537700  | -0.876830 |
| atom                                          | 4  | 0.038509  | 0.348142  | -0.309633 |
| atom                                          | 5  | 0.189888  | 0.837074  | -0.647186 |
| atom                                          | 6  | -0.065147 | 0.254184  | -0.319331 |
| atom                                          | 7  | 0.087350  | 0.223082  | -0.135732 |
| atom                                          | 8  | 0.134004  | 0.134837  | -0.000833 |
| atom                                          | 9  | 12.400467 | 13.201703 | -0.801236 |
| atom                                          | 10 | 18.795804 | 21.182930 | -2.387125 |
| atom                                          | 11 | -0.099855 | 0.001160  | -0.101015 |
| atom                                          | 12 | 0.348248  | 0.589833  | -0.241585 |
| atom                                          | 13 | -0.226098 | 0.043455  | -0.269553 |
| atom                                          | 14 | -0.181982 | 0.048275  | -0.230257 |
| atom                                          | 15 | -0.070422 | 0.340127  | -0.410550 |
| atom                                          | 16 | -0.246021 | 0.043190  | -0.289211 |
| atom                                          | 17 | -0.316793 | 0.045104  | -0.361898 |
| atom                                          | 18 | 2.697223  | 3.483665  | -0.786441 |
| atom                                          | 19 | -0.371951 | 0.045484  | -0.417435 |
| atom                                          | 20 | -0.249110 | 0.045557  | -0.294667 |
| atom                                          | 21 | -0.069557 | 0.298798  | -0.368355 |
| atom                                          | 22 | -0.069164 | 0.050876  | -0.120039 |
| atom                                          | 23 | -0.090503 | 0.052504  | -0.143007 |
| atom                                          | 24 | 0.155788  | 0.877841  | -0.722053 |
| atom                                          | 25 | -0.056245 | 0.061463  | -0.117707 |
| atom                                          | 26 | -0.096751 | 0.046199  | -0.142950 |
| atom                                          | 27 | 0.131865  | 0.132722  | -0.000857 |
| atom                                          | 28 | 0.042600  | 0.042661  | -0.000061 |
| atom                                          | 29 | 0.030899  | 0.034738  | -0.003838 |
| atom                                          | 30 | 0.060629  | 0.214022  | -0.153393 |
| atom                                          | 31 | 0.035073  | 0.038036  | -0.002963 |
| atom                                          | 32 | 0.039115  | 0.039261  | -0.000146 |
| atom                                          | 33 | -0.265259 | 0.070883  | -0.336142 |
| atom                                          | 34 | -0.297923 | 0.022459  | -0.320382 |
| atom                                          | 35 | -0.335949 | 0.061297  | -0.397246 |
| atom                                          | 36 | 0.060074  | 0.064009  | -0.003936 |
| atom                                          | 37 | 0.040599  | 0.041027  | -0.000429 |
| atom                                          | 38 | 0.055638  | 0.060718  | -0.005080 |
| atom                                          | 39 | -0.106860 | 0.000934  | -0.107794 |
| atom                                          | 40 | 0.161976  | 0.172664  | -0.010688 |

### S2.2.3 $\beta$ hydrogen (atom 30)

$$\sigma_{xx} = 27.345961$$

$$\sigma_{yy} = 24.952303$$

$$\sigma_{zz} = 40.364972$$

```

shielding constant   =      30.887746
positive contribution =      41.167843
negative contribution =     -10.280097
sum                  =      30.887746

```

```

atom contributions, total, positive, negative
atom   1      0.004496      0.041094     -0.036598
atom   2     -0.063361      0.175067     -0.238428
atom   3     -0.148612      0.235932     -0.384543
atom   4     -0.107577      0.118772     -0.226348
atom   5     -0.003176      0.178986     -0.182162
atom   6     -0.066798      0.090263     -0.157061
atom   7      0.021901      0.057046     -0.035144
atom   8      0.063094      0.063260     -0.000167
atom   9      1.234497      1.586524     -0.352027
atom  10      0.018819      0.193722     -0.174903
atom  11     -0.050825      0.010052     -0.060877
atom  12      0.913646      1.109601     -0.195955
atom  13     -0.158354      0.072990     -0.231344
atom  14     -0.150041      0.032926     -0.182967
atom  15      0.604652      0.860761     -0.256109
atom  16     -0.170582      0.060071     -0.230653
atom  17     -0.237858      0.028780     -0.266637
atom  18      2.938265      3.360239     -0.421973
atom  19     -0.314575      0.066323     -0.380899
atom  20     -0.222285      0.029549     -0.251834
atom  21      1.246181      1.963408     -0.717227
atom  22     -0.064628      0.056871     -0.121499
atom  23     -0.075842      0.035797     -0.111639
atom  24      7.059350      8.868898     -1.809549
atom  25     -0.037547      0.081577     -0.119124
atom  26     -0.077615      0.033987     -0.111602
atom  27      0.324435      0.354534     -0.030098
atom  28      0.045874      0.045936     -0.000062
atom  29      0.026897      0.028023     -0.001126
atom  30     18.482871     20.552587     -2.069715
atom  31      0.027967      0.038441     -0.010474
atom  32      0.029352      0.029630     -0.000277
atom  33      0.043812      0.263928     -0.220116
atom  34     -0.257156      0.020671     -0.277827
atom  35     -0.264196      0.029274     -0.293470
atom  36      0.057806      0.081596     -0.023790
atom  37      0.035448      0.036011     -0.000563
atom  38      0.038199      0.039588     -0.001389
atom  39     -0.093507      0.000142     -0.093649
atom  40      0.234717      0.234988     -0.000271

```

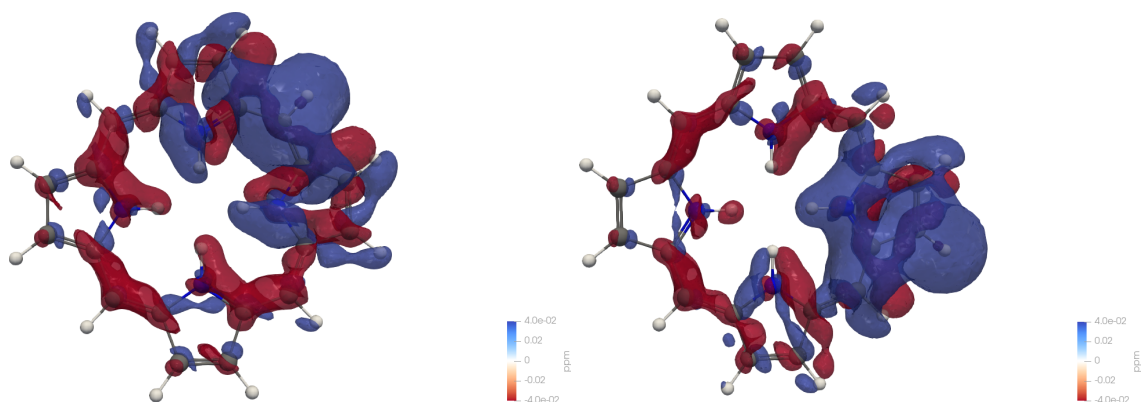

Figure S2: The isotropic  $^1\text{H}$  NMR shielding density of the *meso* and  $\beta$  hydrogens of free-base isophlorin. The shielding contributions are shown in blue and the deshielding contributions in red. An isovalue of  $\pm 0.04$  has been used.

## S2.3 Free-base trans-norcorrole

### S2.3.1 Inner hydrogen (atom 33)

$$\begin{aligned}\sigma_{xx} &= 18.815850 \\ \sigma_{yy} &= 26.894780 \\ \sigma_{zz} &= -71.887386\end{aligned}$$

```
shielding constant    =      -8.725585
positive contribution =      28.479121
negative contribution =     -37.204707
sum                   =     -8.725585
```

```
atom contributions, total, positive, negative
atom   1   -0.738810    0.116265   -0.855075
atom   2   -0.563592    0.267407   -0.830999
atom   3    0.021174    0.292900   -0.271726
atom   4   -0.084085    0.259506   -0.343591
atom   5   -1.876436    0.359555   -2.235991
atom   6   -1.408699    0.801953   -2.210652
atom   7   -0.085229    0.490310   -0.575539
atom   8   -0.082559    0.504351   -0.586911
atom   9   -1.587115    0.784564   -2.371680
atom  10   -2.040686    0.290199   -2.330885
atom  11   -1.987303    0.355541   -2.342845
atom  12   -0.007051    0.356095   -0.363146
atom  13   -0.038579    0.303527   -0.342107
atom  14   -0.737029    0.480049   -1.217077
atom  15   -1.085086    0.204193   -1.289279
atom  16   -0.045413    0.213404   -0.258817
atom  17   -0.045016    0.206217   -0.251233
atom  18   -0.627011    0.184123   -0.811134
atom  19    0.117178    0.117852   -0.000674
atom  20    0.244632    0.246063   -0.001431
atom  21    0.125937    0.126228   -0.000291
atom  22    0.134168    0.136976   -0.002808
atom  23    0.219467    0.219792   -0.000325
atom  24    0.217167    0.217655   -0.000488
atom  25    0.151871    0.152982   -0.001111
atom  26    0.150495    0.150785   -0.000290
```

|      |    |           |           |           |
|------|----|-----------|-----------|-----------|
| atom | 27 | 0.110497  | 0.111269  | -0.000772 |
| atom | 28 | 0.106603  | 0.106801  | -0.000199 |
| atom | 29 | -2.189189 | 0.585587  | -2.774776 |
| atom | 30 | -0.779130 | 3.878476  | -4.657606 |
| atom | 31 | -3.050425 | 1.204457  | -4.254882 |
| atom | 32 | -1.014981 | 0.251435  | -1.266416 |
| atom | 33 | 10.275801 | 14.480523 | -4.204722 |
| atom | 34 | -0.527149 | 0.022080  | -0.549229 |

### S2.3.2 Meso hydrogen (atom 20)

$$\sigma_{xx} = 24.008456$$

$$\sigma_{yy} = 28.565149$$

$$\sigma_{zz} = 34.981831$$

|                       |   |            |
|-----------------------|---|------------|
| shielding constant    | = | 29.185145  |
| positive contribution | = | 40.299796  |
| negative contribution | = | -11.114650 |
| sum                   | = | 29.185145  |

| atom contributions, total, positive, negative |    |           |           |           |
|-----------------------------------------------|----|-----------|-----------|-----------|
| atom                                          | 1  | -0.229709 | 0.035477  | -0.265187 |
| atom                                          | 2  | -0.163659 | 0.066966  | -0.230625 |
| atom                                          | 3  | 0.015107  | 0.103553  | -0.088445 |
| atom                                          | 4  | -0.046697 | 0.087293  | -0.133990 |
| atom                                          | 5  | -0.360473 | 0.067913  | -0.428385 |
| atom                                          | 6  | 0.055281  | 0.337064  | -0.281783 |
| atom                                          | 7  | 0.070690  | 0.314917  | -0.244227 |
| atom                                          | 8  | 0.079296  | 0.680340  | -0.601044 |
| atom                                          | 9  | 0.724202  | 1.715256  | -0.991055 |
| atom                                          | 10 | 8.932376  | 10.218120 | -1.285745 |
| atom                                          | 11 | 1.056566  | 2.034835  | -0.978269 |
| atom                                          | 12 | -0.050762 | 0.655156  | -0.705918 |
| atom                                          | 13 | 0.194003  | 0.405308  | -0.211305 |
| atom                                          | 14 | 0.160146  | 0.423316  | -0.263170 |
| atom                                          | 15 | -0.335328 | 0.067046  | -0.402373 |
| atom                                          | 16 | -0.030570 | 0.097180  | -0.127750 |
| atom                                          | 17 | -0.017577 | 0.089139  | -0.106716 |
| atom                                          | 18 | -0.160243 | 0.068042  | -0.228285 |
| atom                                          | 19 | 0.041792  | 0.042278  | -0.000486 |
| atom                                          | 20 | 18.562535 | 20.491083 | -1.928548 |
| atom                                          | 21 | 0.049347  | 0.049448  | -0.000101 |
| atom                                          | 22 | 0.034807  | 0.042623  | -0.007816 |
| atom                                          | 23 | 0.134429  | 0.134892  | -0.000462 |
| atom                                          | 24 | 0.106552  | 0.202215  | -0.095663 |
| atom                                          | 25 | 0.089948  | 0.202073  | -0.112125 |
| atom                                          | 26 | 0.140968  | 0.141322  | -0.000354 |
| atom                                          | 27 | 0.036742  | 0.044504  | -0.007762 |
| atom                                          | 28 | 0.050087  | 0.050165  | -0.000077 |
| atom                                          | 29 | -0.307741 | 0.081796  | -0.389536 |
| atom                                          | 30 | 0.258535  | 0.553010  | -0.294474 |
| atom                                          | 31 | 0.262145  | 0.601925  | -0.339780 |
| atom                                          | 32 | -0.204050 | 0.078085  | -0.282136 |
| atom                                          | 33 | 0.088347  | 0.109438  | -0.021091 |
| atom                                          | 34 | -0.051949 | 0.008019  | -0.059968 |

### S2.3.3 $\beta$ hydrogen at pyrrole with inner hydrogen (atom 23)

$$\sigma_{xx} = 27.091696$$

$$\sigma_{yy} = 25.961988$$

$$\sigma_{zz} = 31.426613$$

|                       |   |            |
|-----------------------|---|------------|
| shielding constant    | = | 28.160099  |
| positive contribution | = | 38.864468  |
| negative contribution | = | -10.704368 |
| sum                   | = | 28.160099  |

| atom contributions, total, positive, negative |    |           |           |           |
|-----------------------------------------------|----|-----------|-----------|-----------|
| atom                                          | 1  | -0.178707 | 0.063806  | -0.242513 |
| atom                                          | 2  | 0.072004  | 0.252699  | -0.180694 |
| atom                                          | 3  | 0.133557  | 0.290359  | -0.156802 |
| atom                                          | 4  | -0.137074 | 0.349481  | -0.486554 |
| atom                                          | 5  | 0.186813  | 0.762382  | -0.575569 |
| atom                                          | 6  | 2.658028  | 3.126237  | -0.468209 |
| atom                                          | 7  | 5.161418  | 7.215018  | -2.053600 |
| atom                                          | 8  | 0.955871  | 1.631803  | -0.675932 |
| atom                                          | 9  | 0.713009  | 0.951154  | -0.238145 |
| atom                                          | 10 | -0.155876 | 0.182011  | -0.337887 |
| atom                                          | 11 | -0.341734 | 0.066825  | -0.408558 |
| atom                                          | 12 | -0.018903 | 0.098755  | -0.117658 |
| atom                                          | 13 | -0.000350 | 0.093451  | -0.093801 |
| atom                                          | 14 | -0.159936 | 0.083876  | -0.243812 |
| atom                                          | 15 | -0.231651 | 0.045709  | -0.277361 |
| atom                                          | 16 | -0.027209 | 0.069539  | -0.096748 |
| atom                                          | 17 | -0.026410 | 0.071500  | -0.097909 |
| atom                                          | 18 | -0.245072 | 0.043828  | -0.288900 |
| atom                                          | 19 | 0.045775  | 0.048396  | -0.002621 |
| atom                                          | 20 | 0.057046  | 0.075961  | -0.018915 |
| atom                                          | 21 | 0.095304  | 0.096643  | -0.001340 |
| atom                                          | 22 | -0.043690 | 0.101631  | -0.145322 |
| atom                                          | 23 | 18.457445 | 20.713215 | -2.255771 |
| atom                                          | 24 | 0.321424  | 0.353751  | -0.032327 |
| atom                                          | 25 | 0.037211  | 0.042843  | -0.005632 |
| atom                                          | 26 | 0.050422  | 0.050493  | -0.000071 |
| atom                                          | 27 | 0.039792  | 0.040058  | -0.000266 |
| atom                                          | 28 | 0.037675  | 0.038374  | -0.000698 |
| atom                                          | 29 | 0.190379  | 0.411106  | -0.220726 |
| atom                                          | 30 | 0.953497  | 1.184922  | -0.231425 |
| atom                                          | 31 | -0.317597 | 0.095770  | -0.413367 |
| atom                                          | 32 | -0.211959 | 0.048697  | -0.260656 |
| atom                                          | 33 | 0.153636  | 0.158537  | -0.004901 |
| atom                                          | 34 | -0.064038 | 0.005636  | -0.069674 |

### S2.3.4 $\beta$ hydrogen at pyrrole without inner hydrogen (atom 21)

$$\sigma_{xx} = 22.832178$$

$$\sigma_{yy} = 26.561766$$

$$\sigma_{zz} = 31.283136$$

|                       |   |            |
|-----------------------|---|------------|
| shielding constant    | = | 26.892360  |
| positive contribution | = | 37.531359  |
| negative contribution | = | -10.638998 |
| sum                   | = | 26.892360  |

| atom contributions, total, positive, negative |    |           |           |           |
|-----------------------------------------------|----|-----------|-----------|-----------|
| atom                                          | 1  | 0.682547  | 1.097700  | -0.415152 |
| atom                                          | 2  | 2.237483  | 2.701635  | -0.464152 |
| atom                                          | 3  | 3.738517  | 6.579535  | -2.841018 |
| atom                                          | 4  | 1.251080  | 1.851137  | -0.600058 |
| atom                                          | 5  | 0.832816  | 1.075474  | -0.242657 |
| atom                                          | 6  | -0.202722 | 0.147203  | -0.349924 |
| atom                                          | 7  | -0.026768 | 0.144013  | -0.170781 |
| atom                                          | 8  | 0.000824  | 0.112207  | -0.111382 |
| atom                                          | 9  | -0.071289 | 0.103694  | -0.174983 |
| atom                                          | 10 | -0.205351 | 0.034365  | -0.239716 |
| atom                                          | 11 | -0.189847 | 0.042074  | -0.231921 |
| atom                                          | 12 | 0.001127  | 0.073099  | -0.071972 |
| atom                                          | 13 | -0.027527 | 0.061396  | -0.088922 |
| atom                                          | 14 | -0.251108 | 0.045826  | -0.296934 |
| atom                                          | 15 | -0.110055 | 0.113689  | -0.223744 |
| atom                                          | 16 | -0.007889 | 0.120534  | -0.128423 |
| atom                                          | 17 | -0.021424 | 0.159819  | -0.181243 |
| atom                                          | 18 | -0.291123 | 0.141751  | -0.432874 |
| atom                                          | 19 | 0.038702  | 0.173506  | -0.134804 |
| atom                                          | 20 | 0.037441  | 0.038253  | -0.000812 |
| atom                                          | 21 | 18.237133 | 20.214435 | -1.977302 |
| atom                                          | 22 | 0.351699  | 0.376998  | -0.025298 |
| atom                                          | 23 | 0.017970  | 0.049141  | -0.031171 |
| atom                                          | 24 | 0.057390  | 0.057588  | -0.000198 |
| atom                                          | 25 | 0.037123  | 0.037258  | -0.000135 |
| atom                                          | 26 | 0.032463  | 0.034345  | -0.001882 |
| atom                                          | 27 | 0.065270  | 0.065361  | -0.000091 |
| atom                                          | 28 | 0.037381  | 0.058575  | -0.021194 |
| atom                                          | 29 | 1.155757  | 1.417526  | -0.261769 |
| atom                                          | 30 | -0.081019 | 0.136518  | -0.217537 |
| atom                                          | 31 | -0.284765 | 0.058228  | -0.342993 |
| atom                                          | 32 | -0.128939 | 0.154254  | -0.283193 |
| atom                                          | 33 | -0.006313 | 0.023623  | -0.029936 |
| atom                                          | 34 | -0.014225 | 0.030601  | -0.044826 |

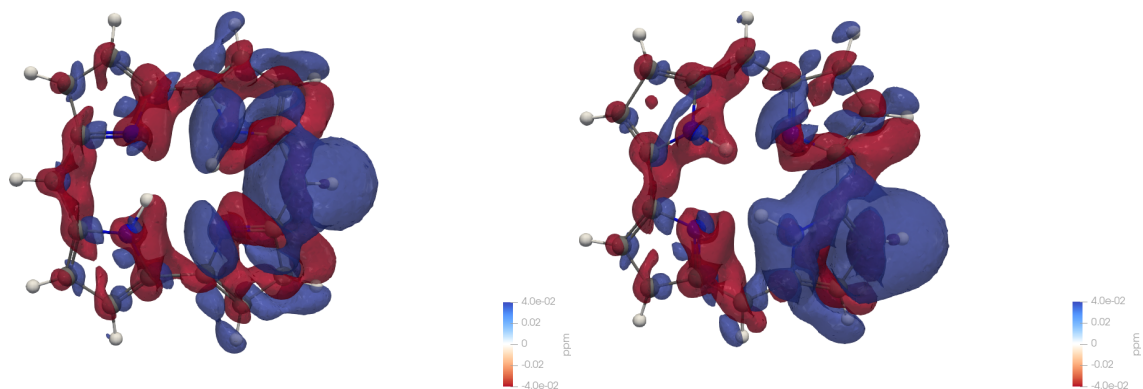

Figure S3: The isotropic  $^1\text{H}$  NMR shielding density of the *meso* and  $\beta$  hydrogens of free-base *trans*-norcorrole. The shielding contributions are shown in blue and the deshielding contributions in red. An isovalue of  $\pm 0.04$  has been used.
